# Supplementary material for: Sequential MCR via Staudinger/aza-Wittig versus Cycloaddition Reaction to Access Diversely Functionalized 1-amino-1H-imidazole-2(3H)-thiones
Source: Preprints.org preprint supplement (doi:10.20944/preprints201909.0294.v1), 2019-09-26
Supplement: Supplementary file 1 [file S.I.docx]

**Supplementary Material**

**for**

**Sequential MCR *via* Staudinger/aza-Wittig *versus* cycloaddition reaction to access diversely functionalized 1-amino-1*H*-imidazole-2(3*H*)-thiones**

Cecilia Ciccolini 1, Giacomo Mari 1, Gianfranco Favi 1,*, Fabio Mantellini 1, Lucia De Crescentini 1, Stefania Santeusanio 1,*

Address:

1 Department of Biomolecular Sciences, Section of Chemistry and Pharmaceutical Technologies, University of Urbino “Carlo Bo”, Via I Maggetti 24, 61029 Urbino (PU), Italy

E-mail:

Stefania Santeusanio* - [stefania.santeusanio@uniurb.it](mailto:stefania.santeusanio@uniurb.it)

Gianfranco Favi* - [gianfranco.favi@uniurb.it](mailto:gianfranco.favi@uniurb.it)

*Corresponding author

**Table of contents**

1. Synthetic procedure referred to Scheme 2 **S2**
2. Copies of 1H-NMR and 13C-NMR spectra of compounds **II**, **2a**, **3a**, **5a**-**k**, **7a**-**c** and **8a**-**c S3-S24**
3. References **S25**

Procedure referred to **Scheme 2**.

To a stirred solution of 2-chloro-*N*,*N*-dimethyl-3-oxobutanamide (**A**) (1 mmol) in AcOH (4 mL) finely crashed potassium thiocyanate (**B**) (1.5 mmol) was added at room temperature. After 1 hour, *tert*-butyl hydrazinecarboxylate (**C**) (1 mmol) was added portionwise quickly. In a short time the reaction mixture turned yellow and was left to stirr until the disappeareance of **A** (TLC check, 2 hrs). The crude reaction mixture was then treated with a diluted solution of 5% NaOH until neutrality, extracted with EtOAc (50 mL) and washed with water (3 x 10 mL). The combined organic phases were dried (Na2SO4), concentrated under reduced pressure and purified by column chromatography eluting with cyclohexane:EtOAc mixture (from 1:1 to pure EtOAc) to afford **II** as major product.

*tert*-Butyl (5-((dimethylamino)carbonyl)-2-imino-4-methyl-1,3-thiazol-3(2*H*)-yl)carbamate (**II**): Yield 48% (144.2 mg) white powder from EtOAc / light petroleum ether; Mp 157–161 °C (dec.); 1H-NMR (400 MHz, DMSO-*d*6) δ 1.34 and 1.43 (2 s, 9 H, OBu*t*), 1.90 (s, 3 H, CH3), 2.94 [s, 6 H, N(CH3)2], 8.21 (br s, 1 H, NH), 9.48 (br s, 1 H, NH); 13C-NMR (100 MHzDMSO-*d*6) δ 12.7, 27.6, 27.8, 36.7, 80.5, 98.5, 137.0, 154.6, 158.0, 162.8; IR (Nujol, ν, cm−1): 3320, 3254, 3200, 1736, 1633, 1607; MS *m/z* (ESI): 301.15 (M + H)+; calcd. for C12H20N4O3S (300.38): C, 47.98; H, 6.71; N, 18.65; found: C, 48.07; H, 6.75; N, 18.69 [1].

The partition of some signals here, as well as in the following cases, is caused by the N1-amide rotameric effect [2].

**HMQC 5a**

**HMQC 8c**

References:

[1] Attanasi, O. A.; Favi, G.; Filippone, P.; Perrulli, F. R.; Santeusanio, S. *Synlett* **2010**, 1859-1861, DOI: 10.1055/s-0030-1258108.

[2] Qi, L.-W.; Mao, J.-H.; Zhang, J.; Tan, B. *Nat. Chem.* **2018**, *10*, 58-64, DOI: 10.1038/NCHEM.2866.
